# Supplementary material for: Highly multiplexed immune profiling throughout adulthood reveals kinetics of lymphocyte infiltration in the aging mouse prostate
Source: Aging (Albany NY). 2023 May 13;15(9):3356–80. doi: 10.18632/aging.204708 (PMC10449296; doi:10.18632/aging.204708)
Supplement: Supplementary Table 1 [file aging-15-204708-s002.xlsx]

## Sheet: Sheet1
Supplementary Table 1. Abundance of X-Shift-generated immune cell clusters in the aging mouse prostate, bladder, and kidney from the discovery experiment.
			% in Cluster of Total CD45+ Cells in Tissue
Tissue	Age (Months)	Replicate	T1	T2	T3	T4	T5	T6	T7	T8	T9	T10	B1	B2	NK1	NK2	M1	M2	M3	M4	M5	M6	M7	M8	M9	M10	U1	U2	U3	U4	U5
Prostate	3	A	0.622586	0.610131	0	0.944718	0.317155	0.959151	1.25647	1.24822	3.14547	0.311157	1.2561	0.304447	1.86972	5.63926	6.27363	0.623814	16.5838	5.61176	15.9163	1.55457	4.37463	4.9941	3.72514	11.2525	1.24807	1.54954	1.56769	1.86835	4.37157
		B	0.655448	0.181689	0.277511	0.468875	0.747688	0.36963	0.647196	0.743409	1.85895	1.76823	1.00098	2.71981	1.39482	7.165	5.66831	0.185764	2.9729	4.83103	12.9251	1.9573	5.21084	12.8509	8.64748	16.0956	1.20986	3.16304	1.3028	0.745948	2.23385
		C	1.42983	0.607733	1.01959	0.6137	1.63105	2.01583	1.01476	0.810859	3.45795	1.22121	2.98809	5.49367	1.41494	7.9039	6.71518	0	6.69966	3.84431	6.09073	2.63982	5.28068	6.69192	6.26972	11.1547	2.02862	2.43532	3.65515	0.611345	4.25973
		D	0.842069	0.209689	1.4777	1.05416	0.831653	1.05767	0.841212	1.04119	3.14266	1.25861	1.89514	3.73685	1.67765	7.73407	8.9732	0.417646	9.22484	5.02085	7.104	3.14063	4.61182	8.36476	7.08522	9.01416	1.25516	3.34652	1.46452	0.833912	3.34243
	6	A	1.5001	1.48772	1.24797	0.865927	2.47974	1.74959	1.36356	1.24468	3.4822	1.11849	1.6177	4.84144	2.60548	11.9299	9.94825	0.124002	9.67641	7.44348	6.58224	1.61556	2.85537	3.85331	3.83705	5.97333	1.98684	3.10005	1.36729	1.24347	2.8589
		B	2.21171	1.81079	2.09618	1.95098	1.38838	4.44578	2.50954	2.36849	2.36974	1.25246	2.36279	6.40021	2.50568	9.1747	4.03066	0.138855	5.54629	3.47484	19.2004	2.22189	4.04034	3.33879	2.37447	4.8646	2.22482	1.80245	1.94764	0.97346	0.97307
		C	2.07962	0.828791	1.67111	0.62236	1.45666	1.67731	1.76953	1.04577	3.44299	1.04369	2.30471	6.49711	2.5046	9.07588	5.73901	0.104186	16.1775	3.34	9.91494	1.4576	2.81346	5.32421	4.80754	5.32293	1.35711	3.23911	2.19204	1.25279	0.937485
		D	1.72208	1.00245	1.14164	0.718601	1.00117	0.720997	0.433955	0.859185	2.84904	1.14199	3.55268	5.01752	1.42514	5.84933	8.427	0	16.38	4.14442	5.69851	1.56835	4.70826	9.53002	6.56864	7.98529	0.712613	2.85159	1.14255	0.568465	2.27848
	9	A	5.88431	2.09418	1.66885	4.4762	3.50241	7.70411	5.16908	2.2353	3.2064	0.696521	7.28684	16.5074	1.25992	5.30948	4.3407	0.41892	14.9599	2.2383	4.48426	0.695976	0.833098	0.981592	0.98548	0.553273	0.140283	0.693724	0.837868	0.557637	0.277937
		B	4.41336	7.64702	3.41053	1.1996	3.8287	3.63259	2.40503	0.803655	2.61715	0.400671	3.41717	6.64273	1.00524	4.02687	9.04233	0.200818	9.66804	2.20069	9.45246	0.807738	3.02676	2.81208	2.23487	3.43394	2.21234	5.22964	1.80742	1.6128	0.807738
		C	5.64138	4.01193	4.68822	2.92545	3.53907	4.28733	4.01489	2.04057	3.26631	1.01906	8.85969	20.5493	1.15835	3.67611	7.00062	0.135825	4.41924	0.810873	4.42148	0.611639	2.38125	1.42837	1.89867	1.16128	1.01991	2.44876	2.04008	0.2712	0.273159
		D	3.1678	2.47075	3.70599	1.93098	1.00502	3.92871	3.54693	1.00044	1.3144	0.307328	5.11111	11.8192	0.385526	3.00435	8.87216	18.5804	15.2796	1.85177	3.16215	0.92261	1.6203	0.923798	1.00345	0.610306	1.15665	1.23425	0.771198	0.539938	0.772857
	12	A	9.32027	5.10421	2.71614	6.10167	5.72306	9.5936	6.99175	1.77602	1.99268	0.0552278	11.0846	15.3104	0.831361	1.99577	3.3279	0.0553609	3.046	1.16808	5.26846	0.885857	1.10675	1.10879	0.6161	1.05056	0.498658	1.33079	0.832598	0.609191	0.498148
		B	10.0885	2.91742	2.90028	7.52882	3.41506	7.3521	5.4663	2.73368	4.4512	0.51109	7.846	15.3724	0.854844	3.25599	6.83078	0	7.18261	1.20108	1.37727	0.343446	2.39518	1.02895	1.01978	0.498569	0.343121	1.20417	0.858333	1.02295	0
		C	11.9771	2.30062	3.40111	5.39202	4.89001	14.0809	6.18536	1.4974	2.5979	0.0994306	9.66726	14.3768	1.59531	3.09076	3.59943	0	4.58753	0.896623	2.19227	0.496764	1.79434	0.700627	0.595186	0.394907	0.699209	1.69312	0.699009	0.300728	0.198382
		D	8.94141	6.03992	4.8692	6.56813	3.67997	9.73077	6.82815	2.62535	3.15521	0.13089	8.40951	14.4431	1.84059	3.29229	2.87894	0	0.798256	1.84557	3.02055	0.390067	1.70288	1.83728	0.925952	0.656656	0.788623	2.10264	1.3138	1.05373	0.130574
	16	A	9.42169	8.66602	7.4437	8.36094	3.94678	8.97429	6.22738	2.13005	1.67126	0	5.59364	15.2203	0.759459	2.89268	2.28873	0.151719	3.33105	0.918168	2.89214	0.451053	1.52448	0	0.304744	0.60113	0.759505	1.82354	1.51921	1.82435	0.301978
		B	4.93665	6.60622	6.79767	2.30152	2.53831	5.61415	4.22842	0.777677	1.45662	0.134763	11.7424	24.7231	0.40489	0.847429	2.061	0.236403	11.7028	0.983234	3.58534	0.472482	0.540827	0.812051	0.779182	0.915534	0.101207	2.13239	1.31583	1.21827	0.0336095
		C	11.5675	6.23482	5.06413	5.2368	3.52378	4.16098	3.61422	1.17177	2.98104	0.179981	7.67494	21.3276	0.724713	3.51888	5.50509	0.0902074	2.8873	3.06893	2.71164	0.362835	1.2652	0.991423	0.905959	1.1663	0.451579	1.89378	1.35667	0.272176	0.0897737
		D	12.7249	7.52194	15.2867	3.58859	4.63286	7.06728	7.41247	0.348833	0.932552	0.115313	4.7206	8.46194	0.464319	1.96321	5.33685	0.346772	11.0992	0.812967	2.0848	0.343646	0.580732	0.348231	0.690256	0.337464	0.116123	0.926207	0.927759	0.692398	0.115035
Bladder	3	A	1.95952	0	1.14622	0.163537	0.164705	1.93383	0.65251	1.62588	6.65968	4.22154	1.47002	0.324994	4.05411	2.11213	6.33093	3.24634	2.74223	5.35172	4.5366	7.78991	5.35746	0.162661	2.76991	29.2181	0	1.79112	1.136	0.646848	2.43145
		B	1.93494	0.6341	1.52924	0.258377	0.130111	2.06002	0.250764	1.79646	7.30571	7.07397	1.66931	0.513468	3.07608	2.04707	9.85619	2.5645	0.778502	5.77642	4.48438	7.6866	7.29922	0	2.95224	15.1296	0	4.22426	0.643136	2.4357	5.88961
		C	6.39231	0.977541	1.85509	0.620333	0.124953	2.46737	0.990046	3.32149	6.90167	3.93819	2.85775	1.73255	3.32624	4.18766	6.51625	2.70859	2.60047	7.25584	4.55885	5.4155	4.30879	0.123402	2.33486	16.1185	0.123451	3.20013	1.106	0.736091	3.20003
		D	2.0478	0.135983	1.08606	0	0	1.3473	0.412829	1.62583	5.56776	5.15616	3.1493	0.271708	4.47736	3.3981	10.7096	2.84949	5.55243	5.95829	6.65226	5.56539	5.01768	0	2.57306	19.1184	0	3.25533	0.137185	1.08759	2.84703
	16	A	3.97257	0.905209	1.98646	0.863313	1.20923	3.84482	1.51146	2.15813	7.6255	1.55374	26.1663	11.9234	1.20963	0.562181	3.66581	0.34491	2.37216	3.5823	1.4667	0.8633	3.3258	0	1.33409	12.587	0.0866249	2.85007	0.561058	0.690594	0.777681
		B	4.26943	2.2383	4.879	1.11936	2.03527	4.42746	2.69798	1.62907	9.06023	2.95506	17.8002	11.1798	1.27096	1.01826	6.6622	1.3224	1.37012	3.92029	1.32541	3.05043	2.39177	0	2.28806	6.91487	0	1.78219	0.763707	0.457393	1.17075
		C	2.62669	2.84982	4.46735	1.09467	1.96568	4.59154	1.27929	0.993642	5.21609	0.555493	41.8576	19.6895	0.639926	0.589428	1.66751	0.269661	0.284585	1.19602	0.707435	1.16119	1.02753	0	0.387839	1.4127	0.0168875	1.95309	0.572433	0.286417	0.639892
		D	3.57365	2.76954	5.54091	0.904595	1.43875	3.04248	0.747554	1.49105	9.66186	1.0133	22.7032	24.3604	0.638132	1.22479	2.98061	0.106453	0.267513	3.41268	0.905363	2.9321	2.18387	0	1.06912	4.20672	0.0534718	0.746366	0.746579	0.318831	0.960093
Kidney	3	A	5.51596	0.445962	0.88847	0.600454	0.440958	2.23231	2.08823	1.63874	0.149942	0.148326	2.1927	3.38631	1.93877	0.439886	2.9906	0.148684	9.83259	8.48733	0.148255	5.05735	2.83235	0.298619	43.183	3.13156	0	0.297844	0.295447	0.745489	0.443907
		B	1.53927	0.191652	0.570248	0.192695	0	2.48577	0.955868	1.91577	0.562621	0	0.768627	1.34546	2.0995	1.15025	3.4463	0.19086	26.0008	5.15087	0.755641	7.84373	2.29734	0.383326	34.8136	3.62187	0	0	0	1.33805	0.379885
		C	2.62033	0.590329	0.734803	0.147429	0.878517	1.90183	1.31956	1.60943	0.294521	0	1.15957	3.32575	1.46191	0.432019	4.23878	0	23.9873	3.51095	0.578131	3.94543	2.78169	0	38.3281	3.80638	0.146697	0.292517	0.147926	1.17275	0.587345
		D	3.29678	0.582943	0.943412	1.059	0.707718	3.65997	1.53689	2.23806	0.118631	0	7.4063	10.015	2.59529	1.05697	5.78077	0.117635	3.76518	5.65673	2.00093	4.00125	2.11776	0.354389	31.4512	7.53097	0	0.471294	0	0.944744	0.590225
	16	A	5.22736	2.79508	3.62218	1.03417	0.621432	2.22346	1.24267	2.27691	0.777245	0.154567	5.27295	9.63411	2.48313	1.34688	7.49591	0.103293	3.62034	9.2921	1.34802	2.74118	3.20558	0.155591	23.9718	3.41409	0	1.29116	0.154944	3.8728	0.62106
		B	3.81936	5.10677	3.65471	0.950906	0.161864	0.950236	1.28251	2.23488	0.321066	0.47641	5.41749	7.6826	1.90848	0.802371	10.697	0.318372	8.46378	11.0135	1.91406	4.46806	3.66555	0.159856	19.271	2.05813	0	1.12246	0.800091	1.27845	0
		C	4.29566	4.82507	2.99185	1.2319	1.40415	3.0768	1.6705	0.615468	0.258455	0.262398	4.12767	6.84638	1.14327	0.874256	10.8015	0.26303	10.0888	11.243	1.31136	2.89792	3.68912	0.264137	20.0145	2.81567	0.0880808	0.351269	0.0888184	2.01907	0.439912
		D	6.13519	4.48168	4.04357	1.41094	1.2645	2.28613	1.7041	2.14299	0.678741	0.0484919	7.3891	9.48922	2.53234	1.45941	9.58818	0.0972175	9.92649	8.58657	1.51108	1.8489	2.19282	0.0976265	12.6135	2.91933	0	1.16848	0.827639	3.01955	0.536157
