# Supplementary material for: Highly multiplexed immune profiling throughout adulthood reveals kinetics of lymphocyte infiltration in the aging mouse prostate
Source: Aging (Albany NY). 2023 May 13;15(9):3356–80. doi: 10.18632/aging.204708 (PMC10449296; doi:10.18632/aging.204708)
Supplement: Supplementary Table 3 [file aging-15-204708-s004.xlsx]

## Sheet: Sheet1
Supplementary Table 3. Abundance of phenotypically matched immune cell clusters in the aging mouse prostate from the validation experiment.
			% in Cluster of Total CD45+ Cells in Tissue
Tissue	Age (Months)	Replicate	T1	T2	T3	T4	T5	T6	T7	T8	T9	T10	B1	B2	NK1	NK2	M1	M2	M3	M4	M5	M6	M7	M8	M9	M10
Prostate	4	A	0.938233	2.18921	9.06959	1.56372	2.18921	4.30023	4.45661	12.9007	28.3034	19.5465	6.1767	3.28382	23.8468	4.53479	4.37842	12.3534	25.4105	4.61298	12.9007	6.95856	9.46052	3.83112	19.0774	9.61689
		B	0.590446	1.23457	9.23242	1.23457	0.85883	3.38164	3.22061	16.9082	26.5164	17.5523	8.69565	1.77134	24.0472	4.88459	2.25443	14.6001	25.9796	7.62211	10.8964	11.3258	13.795	7.40741	22.3296	8.96404
		C	0.594796	1.71004	6.39405	1.78439	0.892193	3.79182	2.89963	13.4572	24.0149	17.6952	7.36059	2.89963	21.7844	5.87361	0.0743494	9.81413	26.8401	4.16357	10.5576	13.829	15.6877	9.88848	18.9591	7.43494
	9	A	0.660905	1.06762	14.7433	0.813421	1.16929	7.11744	2.94865	18.7087	23.5892	22.2674	8.69344	1.16929	28.5714	2.59278	0.101678	13.879	49.1612	8.08338	4.88053	6.35486	5.89731	2.59278	11.2354	4.11795
		B	0.537313	2.80597	10.3881	0.955224	1.37313	2.68657	2.80597	12.8955	15.7612	28.8955	10.1493	1.55224	22.3284	4.23881	0.41791	17.3731	15.7015	1.91045	3.76119	26.4478	17.0746	6.74627	18.6866	2.08955
		C	1.02489	3.12347	9.76086	2.19619	1.46413	3.22108	4.73402	12.1035	20.3514	19.6681	6.53978	2.34261	13.47	5.80771	4.49	8.58956	3.80673	1.1713	5.36847	18.1552	25.0854	10.5905	25.4758	3.12347
	15	A	2.59379	3.28856	11.8573	2.22325	1.48217	4.30755	7.36452	15.6091	23.5757	19.824	11.6721	5.00232	13.988	5.92867	0.555813	8.89301	0.972673	1.76007	5.28022	11.6721	31.1718	7.45716	17.7397	3.61278
		B	2.03333	1.78333	11.8167	1.36667	1.48333	5.46667	6.71667	20.4667	18.8333	15.6833	15.1667	4.71667	13.8667	4.33333	1.93333	6.08333	4.93333	1.58333	2.8	10.1	27.4333	6.65	11.8333	1.53333
		C	1.24539	1.59133	9.9631	1.63745	1.01476	3.82841	7.0572	15.3828	19.488	14.2989	14.9216	6.29613	11.5314	3.7131	0.968635	5.21218	2.67528	0.668819	3.55166	9.82472	27.6983	6.94188	11.5314	1.3607
